# Supplementary material for: Shadows of Adaptation: Phenotypic Polymorphism and Climate Vulnerability in a Genetically Weakly Structured Damselfly
Source: Research Square preprint supplement (doi:10.21203/rs.3.rs-6563484/v1), 2025-05-20
Supplement: Supplementary file 1 [file 6007dc491e5f3f566555294e.pdf]

## Supplementary Information 1. Supporting Tables and Figures.

*Table S1.* The 19 bioclimatic variables from CHELSA. While all variables were included in initial models, we marked those retained for downstream analyses after sequential filtering with "V"

| Bioclimatic variables               | Abbrev. | Dark-winged | Clear-winged | All populations |
|-------------------------------------|---------|-------------|--------------|-----------------|
| Annual Mean Temperature             | bio 1   |             |              |                 |
| Mean Diurnal Range                  | bio 2   |             |              |                 |
| Isothermality                       | bio 3   | V           | V            | V               |
| Temperature Seasonality             | bio 4   | V           | V            | V               |
| Max Temperature of Warmest Month    | bio 5   |             |              |                 |
| Min Temperature of Coldest Month    | bio 6   |             |              | V               |
| Temperature Annual Range            | bio 7   | V           | V            | V               |
| Mean Temperature of Wettest Quarter | bio 8   | V           |              |                 |
| Mean Temperature of Driest Quarter  | bio 9   |             |              |                 |
| Mean Temperature of Warmest Quarter | bio 10  |             | V            | V               |
| Mean Temperature of Coldest Quarter | bio 11  |             |              |                 |
| Annual Precipitation                | bio 12  |             | V            | V               |
| Precipitation of Wettest Month      | bio 13  |             |              | V               |
| Precipitation of Driest Month       | bio 14  |             |              |                 |
| Precipitation Seasonality           | bio 15  |             | V            | V               |
| Precipitation of Wettest Quarter    | bio 16  | V           |              |                 |
| Precipitation of Driest Quarter     | bio 17  | V           |              | V               |
| Precipitation of Warmest Quarter    | bio 18  |             |              | V               |
| Precipitation of Coldest Quarter    | bio 19  |             |              |                 |

Table S2. Number of specimens applied for genomic analysis ( $N_G$ ) and phenotypic analysis ( $N_P$ ).

| Sample site | $N_G$ | $N_P$ |
|-------------|-------|-------|
| Alibang     | 5     | 6     |
| Daxi        | 13    | 13    |
| Longtan     | 11    | 11    |
| Guanxi      | 12    | 12    |
| Neiwan      | 5     | 5     |
| Miaoli      | 5     | 4     |
| Lianhuachi  | 28    | 28    |
| Maolin      | 7     | 7     |
| Shizi       | 8     | 8     |
| Nangang     | 9     | 9     |
| Fushan      | 27    | 24    |
| Xiulin      | 6     | 6     |
| Haiduan     | 4     | 4     |
| Total       | 140   | 137   |

*Note: Sampling sites are ordered by locations from north to south and west to east.*

*Table S3.* The change of potential distribution range under different future Shared Socioeconomic Pathways (SSPs). Positive values indicate an increase, while negative values indicate a decrease in the future potential distribution range.

| Scenario        |           | SSP126    |           |           | SSP370    |           |           | SSP585    |           |  |
|-----------------|-----------|-----------|-----------|-----------|-----------|-----------|-----------|-----------|-----------|--|
| Period          | 2011-2040 | 2041-2070 | 2071-2100 | 2011-2040 | 2041-2070 | 2071-2100 | 2011-2040 | 2041-2070 | 2071-2100 |  |
| Dark-winged     | 48.5%     | 24.9%     | 46.1%     | -4.4%     | -5.9%     | -22.9%    | 42.4%     | 39.5%     | 37.3%     |  |
| Clear-winged    | 54.8%     | 76.6%     | 102.3%    | 76.7%     | 58.5%     | 41.1%     | 65.4%     | 23.7%     | 50.8%     |  |
| All Populations | 39.2%     | 14.1%     | 120.6%    | 22.0%     | -9.8%     | 46.0%     | 40.1%     | 81.9%     | 105.6%    |  |

*Table S4.* Results of variance partitioning analysis following the redundancy analysis (RDA). Partitioning of variance is explained by geographical (geo.) and environmental (env.) factors. The table shows the percentage of variance explained (PVE%) by combined and individual fractions, and  $F$ -statistics were used to assess the significance of each fraction, with statistical significance indicated as:  $p < 0.05$  (\*),  $p < 0.01$  (\*\*),  $p < 0.001$  (\*\*\*).

|                      |         |
|----------------------|---------|
| Combined fractions   | PVE(%)  |
| F~geo.               | 1.27**  |
| F~env.               | 1.29*** |
| Individual fractions |         |
| F~geo.  env.         | 1.54*** |
| F~env.  geo.         | 1.56*** |
| Total explained      | 2.83*** |
| Total unexplained    | 97.17   |
| Total                | 100     |

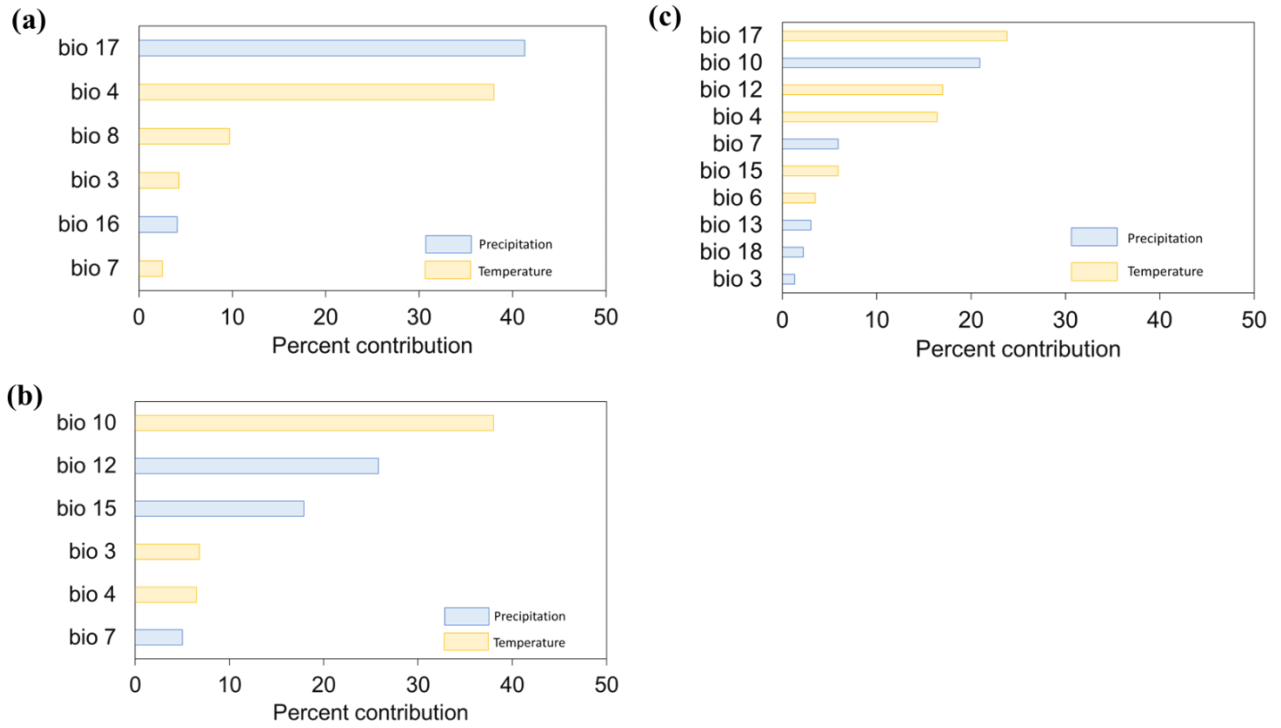

*Figure S1.* The variable contribution of distribution models for (a) Dark-winged individuals, (b) Clear-winged individuals and (c) all individuals.

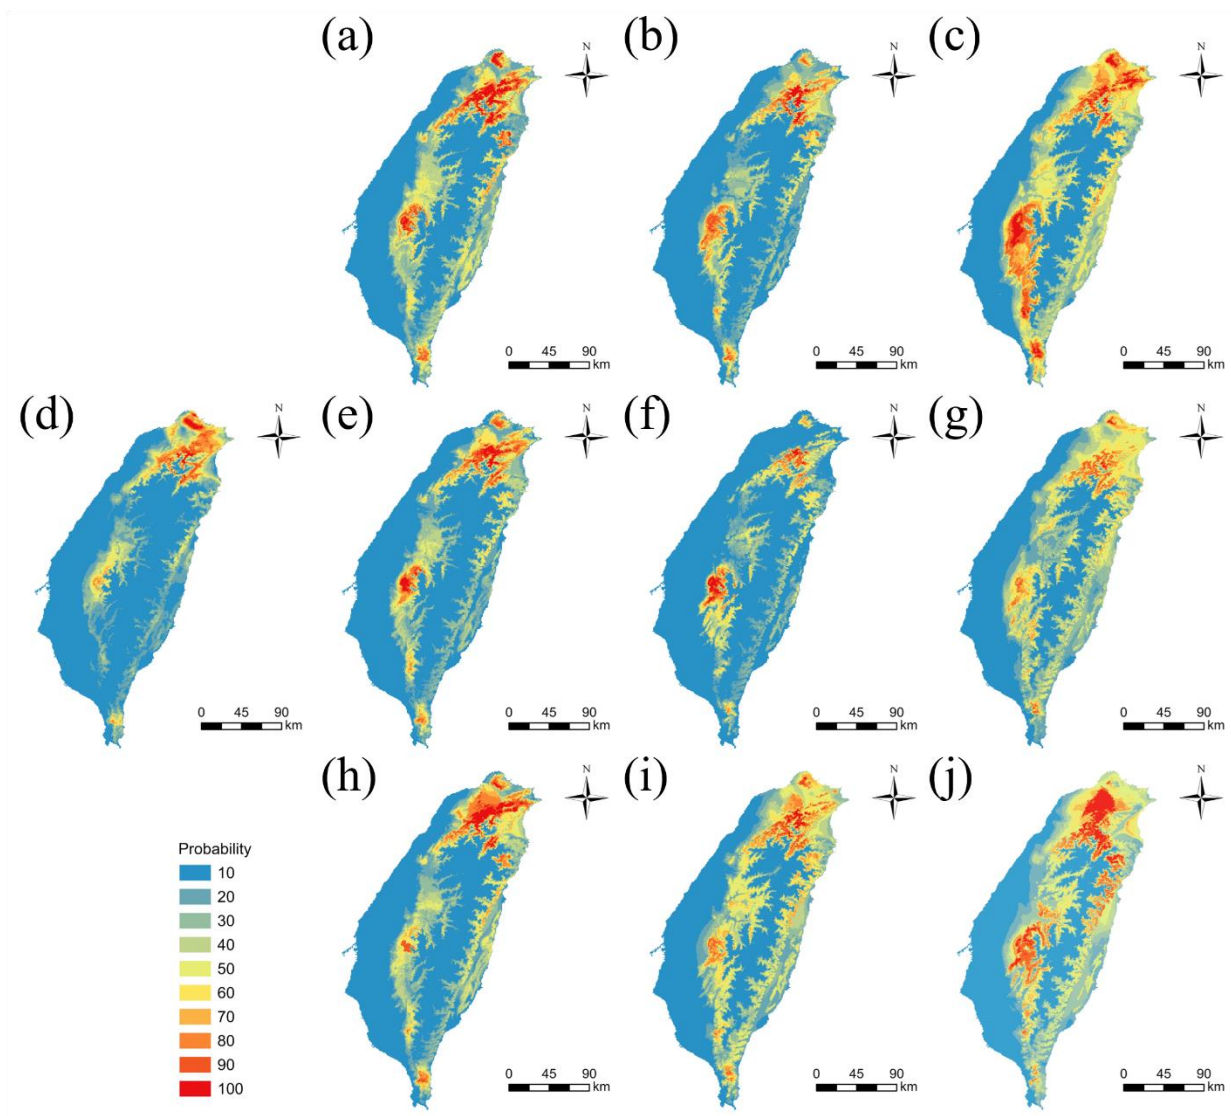

Figure S2. Projected distribution of *Psolodesmus mandarinus* (jointly with all individuals regardless of phenotypes) under current time (d); future distribution under SSP126 in (a) 2011-2040, (b) 2041-2070, and (c) 2071-2100; (d) current time; future distribution under SSP370 in (e) 2011-2040, (f) 2041-2070, and (g) 2071-2100; and future distribution under SSP585 in (h) 2011-2040, (i) 2041-2070, and (j) 2071-2100.

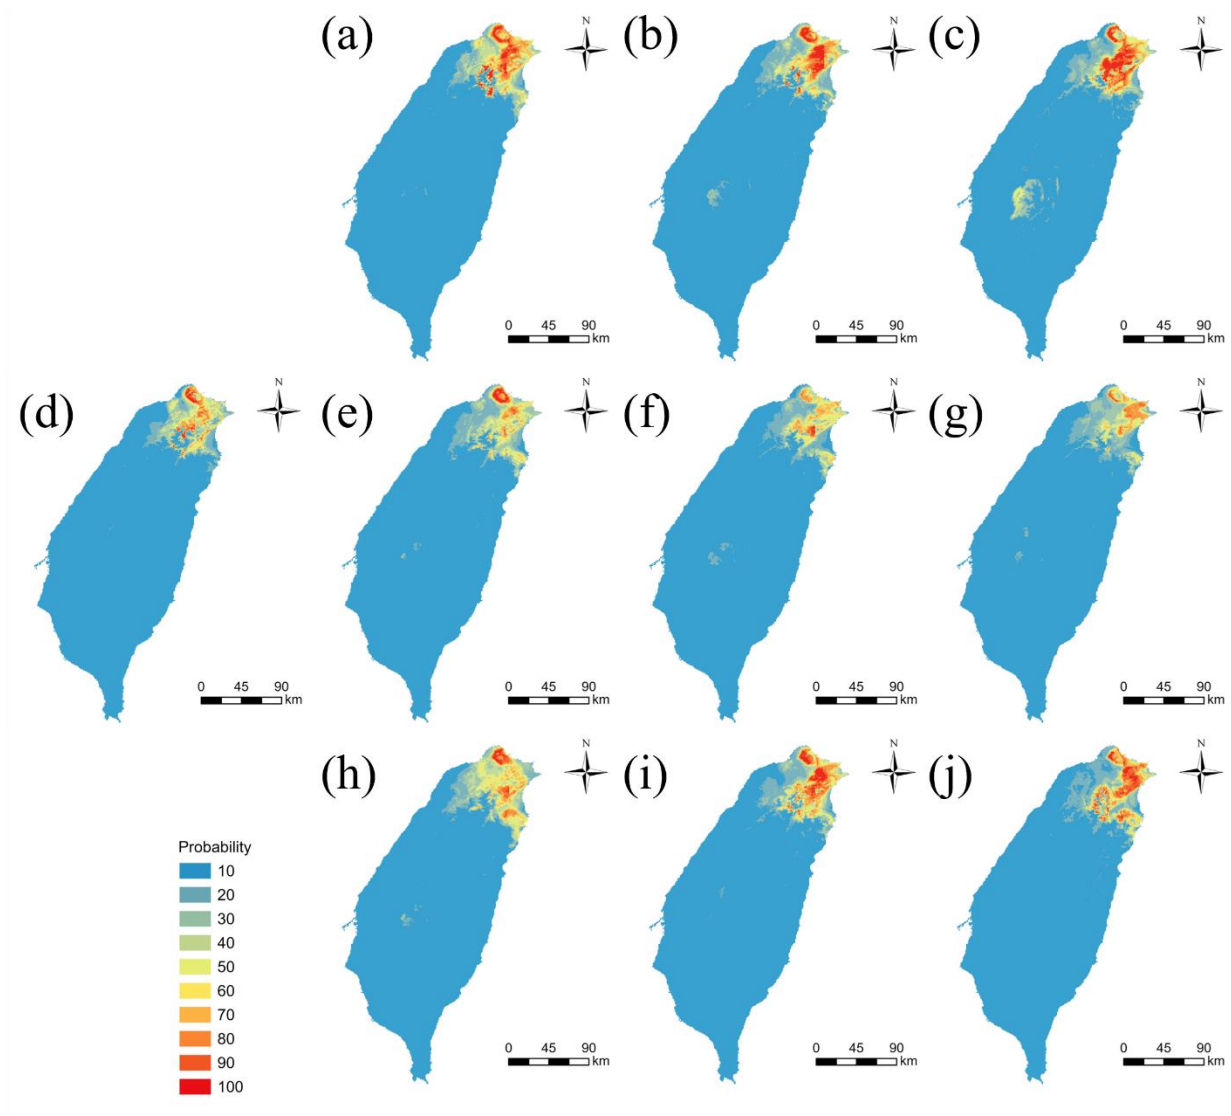

*Figure S3.* Projected distribution of clear-winged individuals of *Psolodesmus mandarinus* under current time (d); future distribution under SSP126 in (a) 2011-2040, (b) 2041-2070, and (c) 2071-2100; (d) current time; future distribution under SSP370 in (e) 2011-2040, (f) 2041-2070, and (g) 2071-2100; and future distribution under SSP585 in (h) 2011-2040, (i) 2041-2070, and (j) 2071-2100.

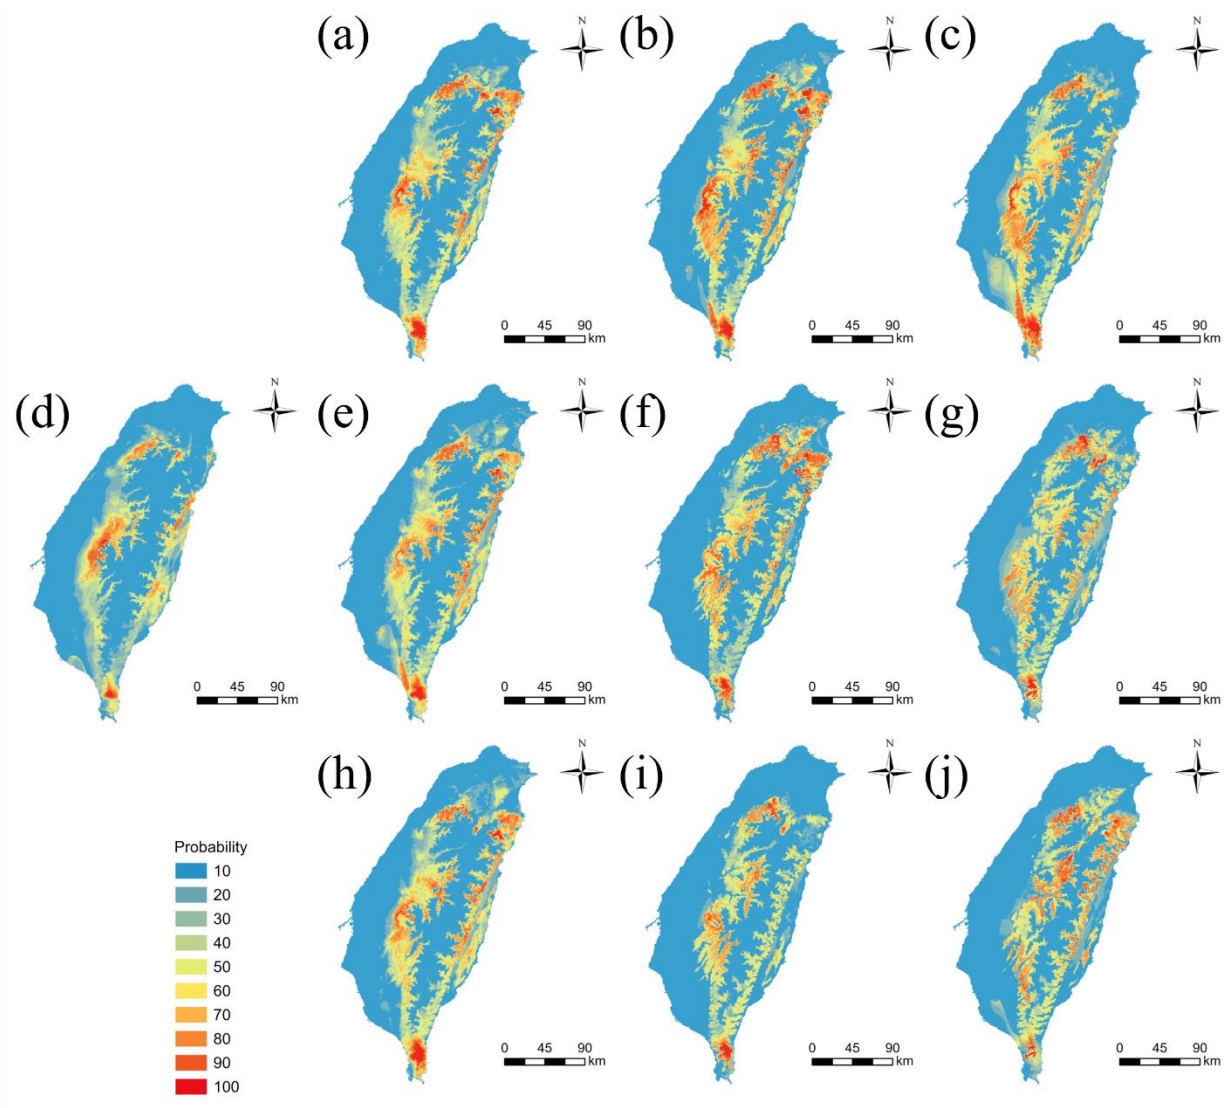

Figure S4. Projected distribution of dark-winged individuals of *Psolosdesmus mandarinus* under current time (d); future distribution under SSP126 in (a) 2011-2040, (b) 2041-2070, and (c) 2071-2100; (d) current time; future distribution under SSP370 in (e) 2011-2040, (f) 2041-2070, and (g) 2071-2100; and future distribution under SSP585 in (h) 2011-2040, (i) 2041-2070, and (j) 2071-2100.



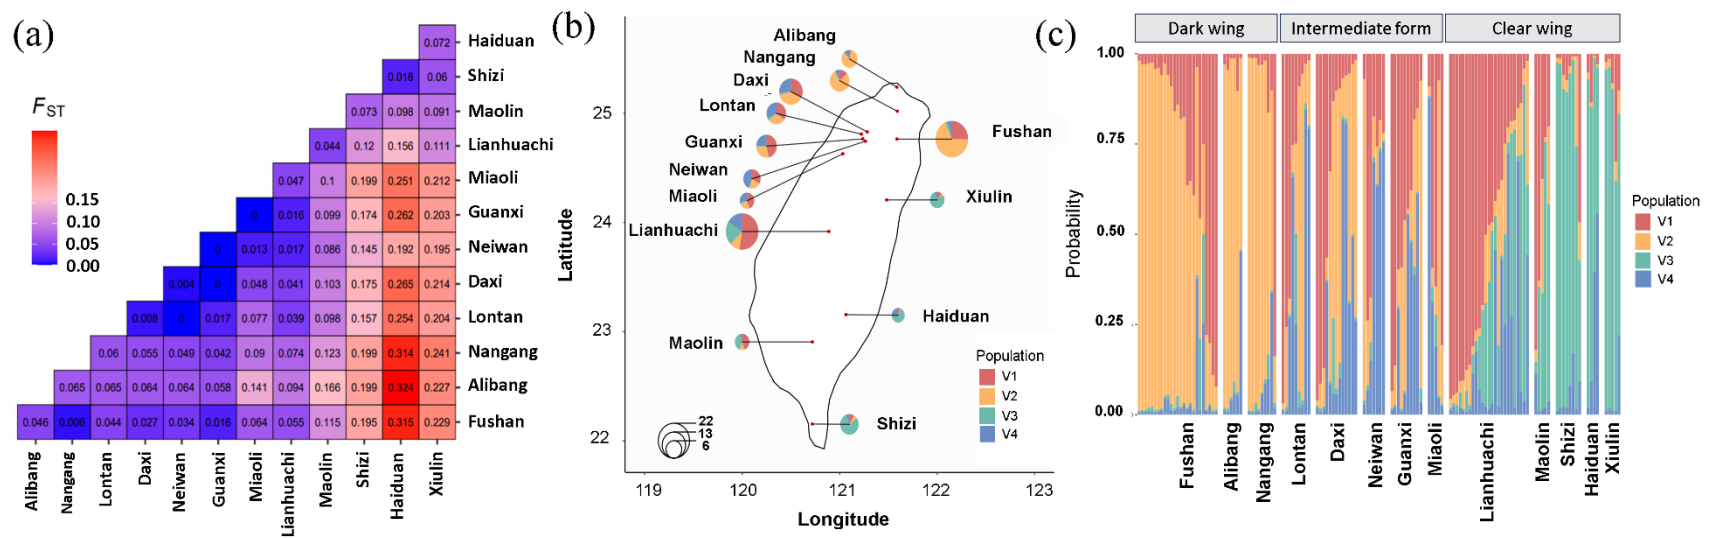

*Figure S5.* Population structure analysis based on the OutCombo dataset: (a) Pairwise  $F_{ST}$  values, (b) Pie chart from STRUCTURE analysis, and (c) Bar chart from STRUCTURE analysis. The OutCombo approach, which filters loci deviating from Hardy-Weinberg equilibrium across all populations combined, minimises artefacts by detecting subtle population structure while accounting for potential biases in individual population-level deviations.

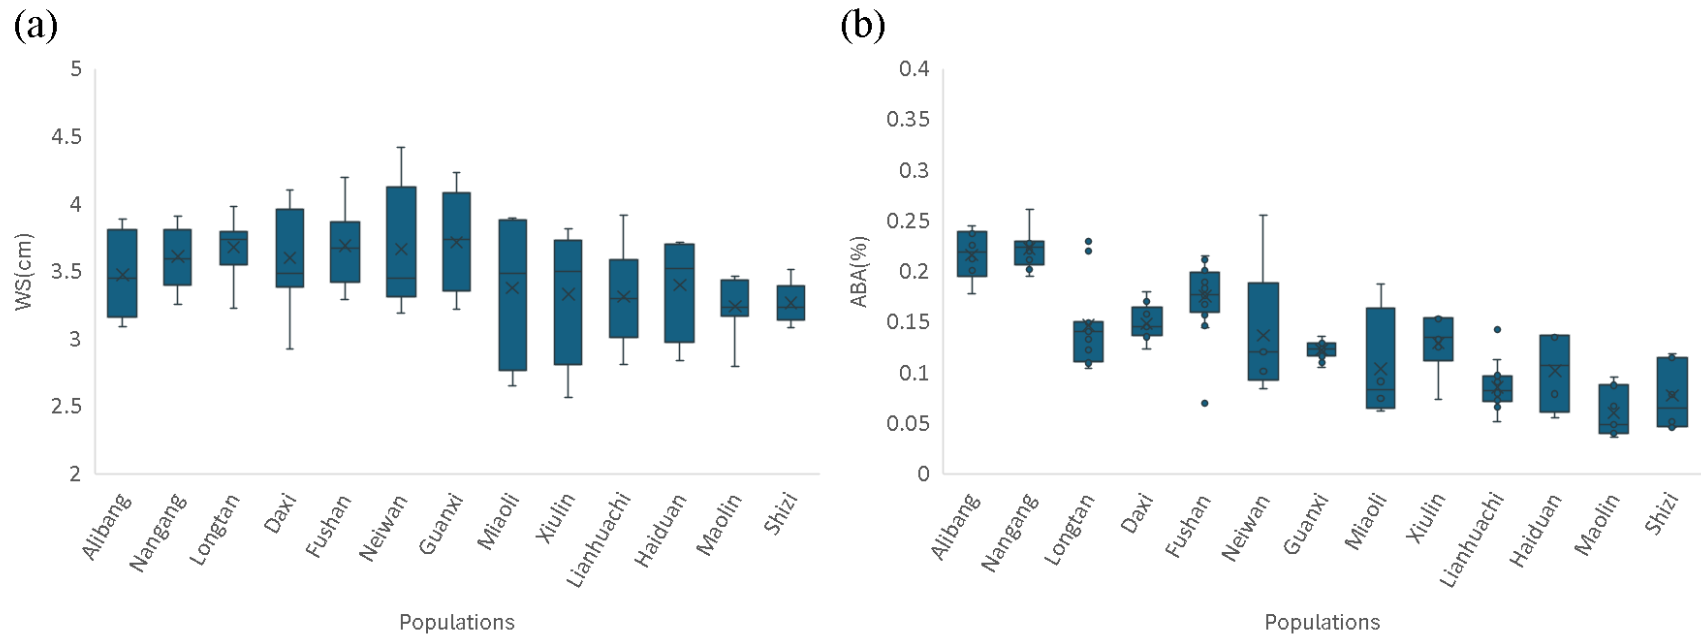

Figure S6. Phenotypic variations of (a) wing size (WS) and (b) the ratio of the apical blackish area of the whole wing (ABA%) are different among populations (WS,  $F = 3.34$ ,  $p < 0.001$ ; ABA%,  $F = 24.61$ ,  $p < 0.001$ ).
